# Supplementary material for: Uncemented Tibial Fixation Has Comparable Prognostic Outcomes and Safety Versus Cemented Fixation in Cruciate-Retaining Total Knee Arthroplasty: A Meta-Analysis of Randomized Controlled Trials
Source: MDPI journal article supplement (doi:10.3390/jcm12051961), 2023-03-01
Supplement: s1 [file s1]

## Supplementary Materials

To analyze the reporting bias of each result, funnel plots were created using RevMan 5, as shown in Figures S1–12.

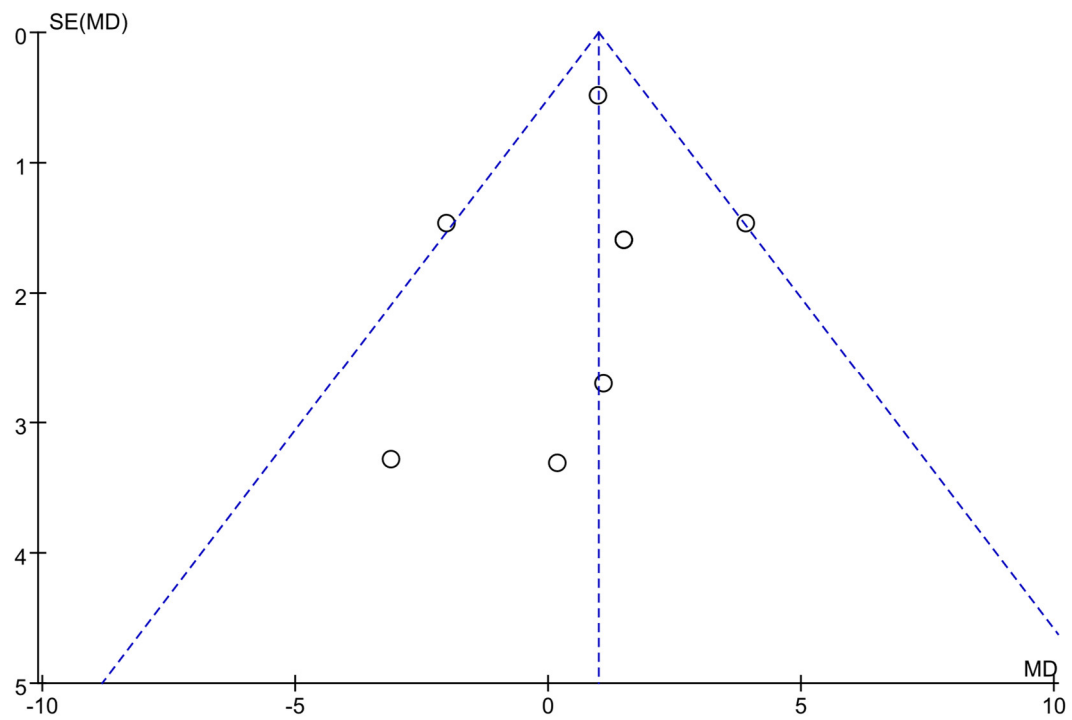

**Figure S1.** Funnel plot of KSXS.

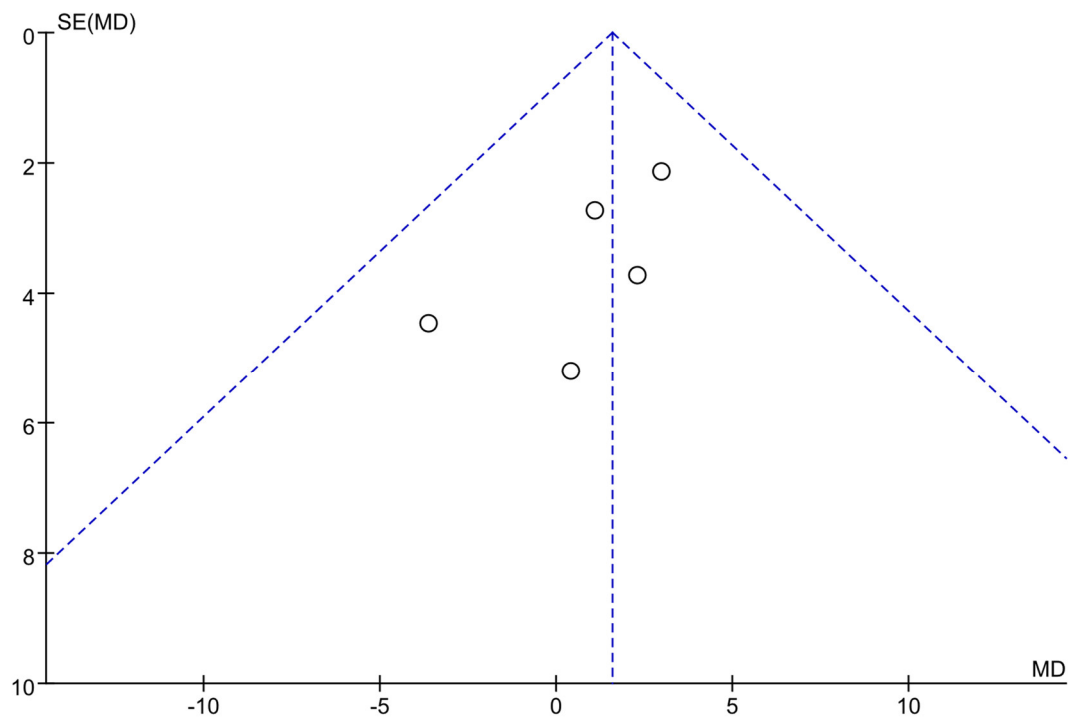

**Figure S2.** Funnel plot of KSFS.

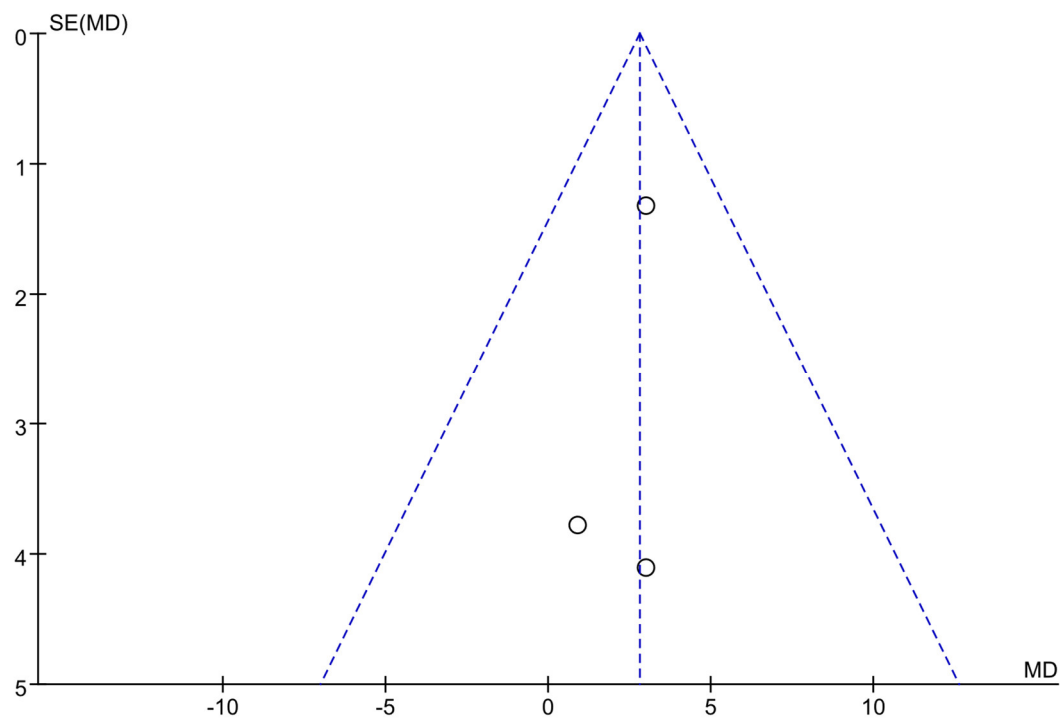

**Figure S3.** Funnel plot of KSS Pain.

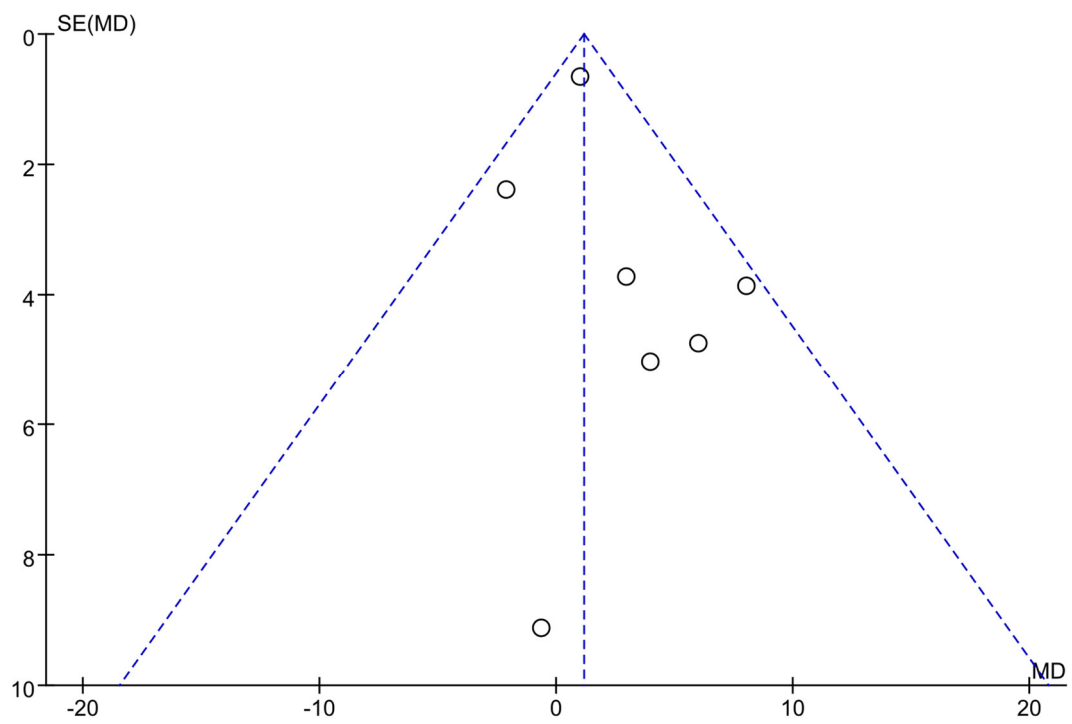

**Figure S4.** Funnel plot of ROM.

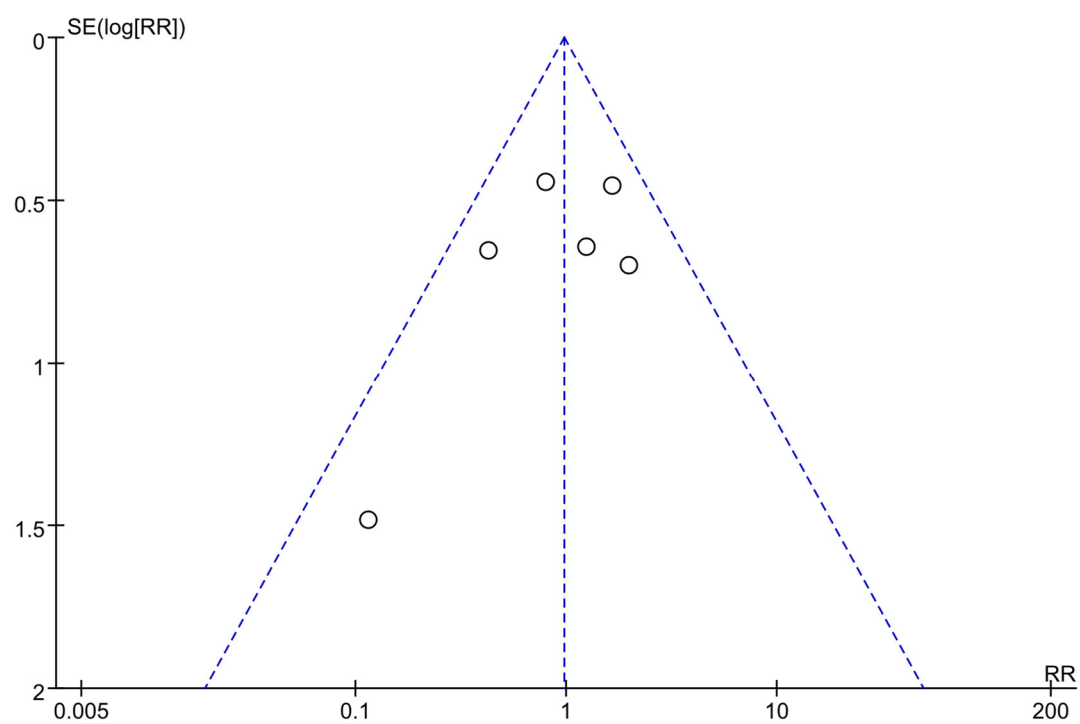

**Figure S5.** Funnel plot of RLL.

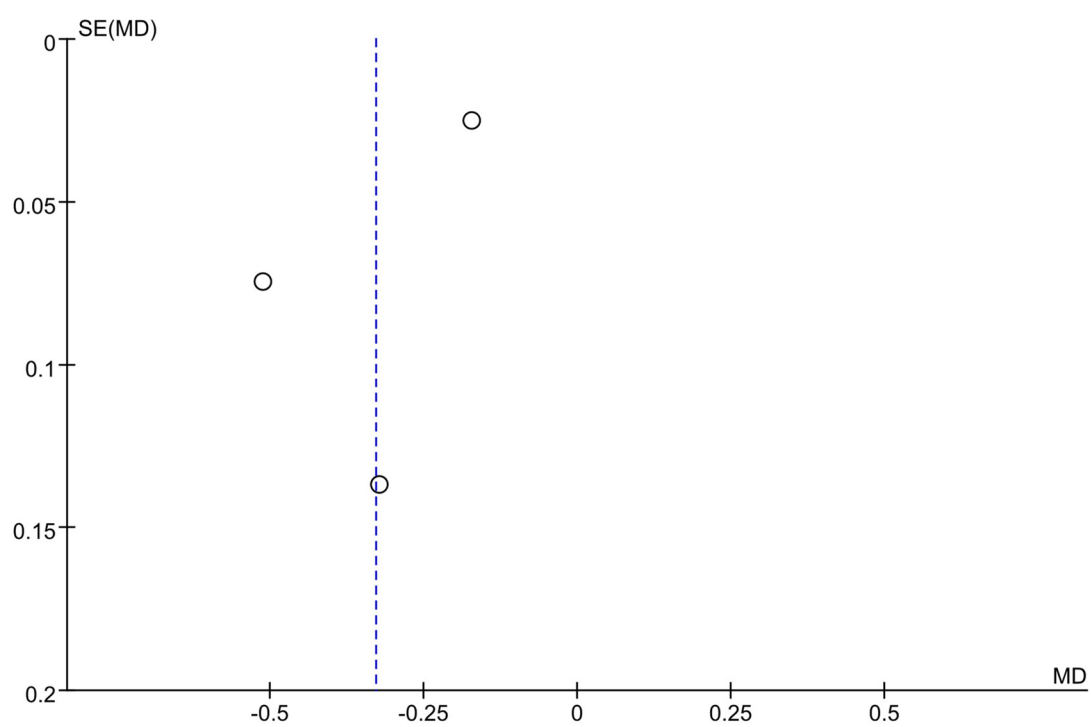

**Figure S6.** Funnel plot of MTPM.

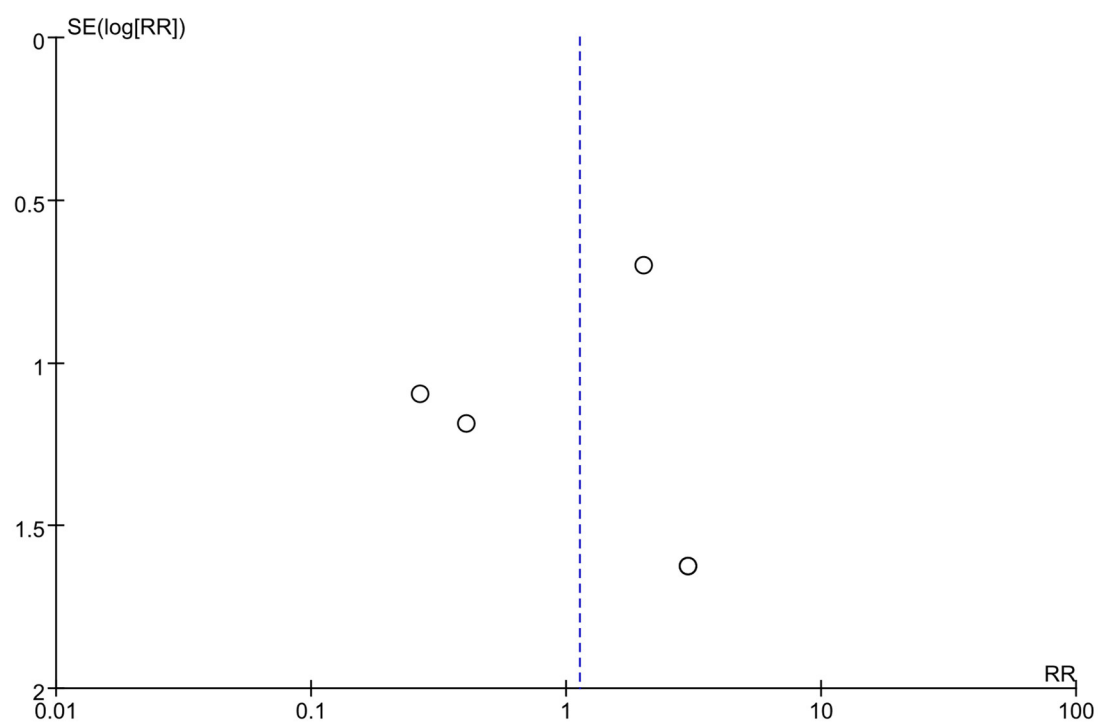

**Figure S7.** Funnel plot of aseptic loosening.

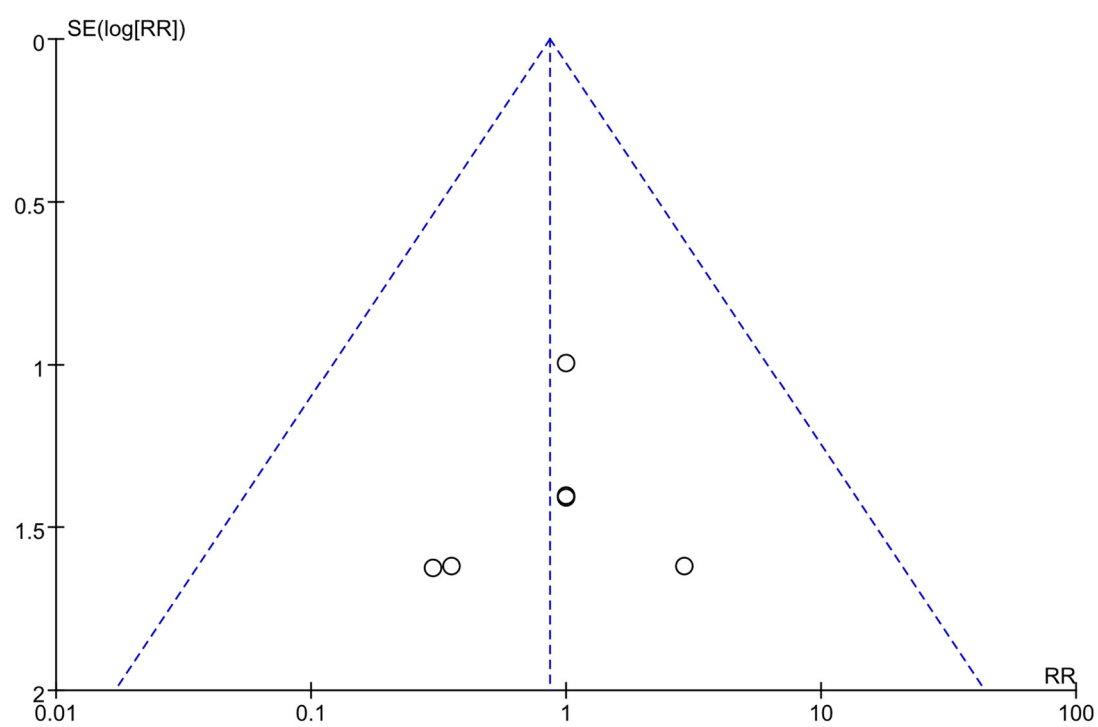

**Figure S8.** Funnel plot of infections.

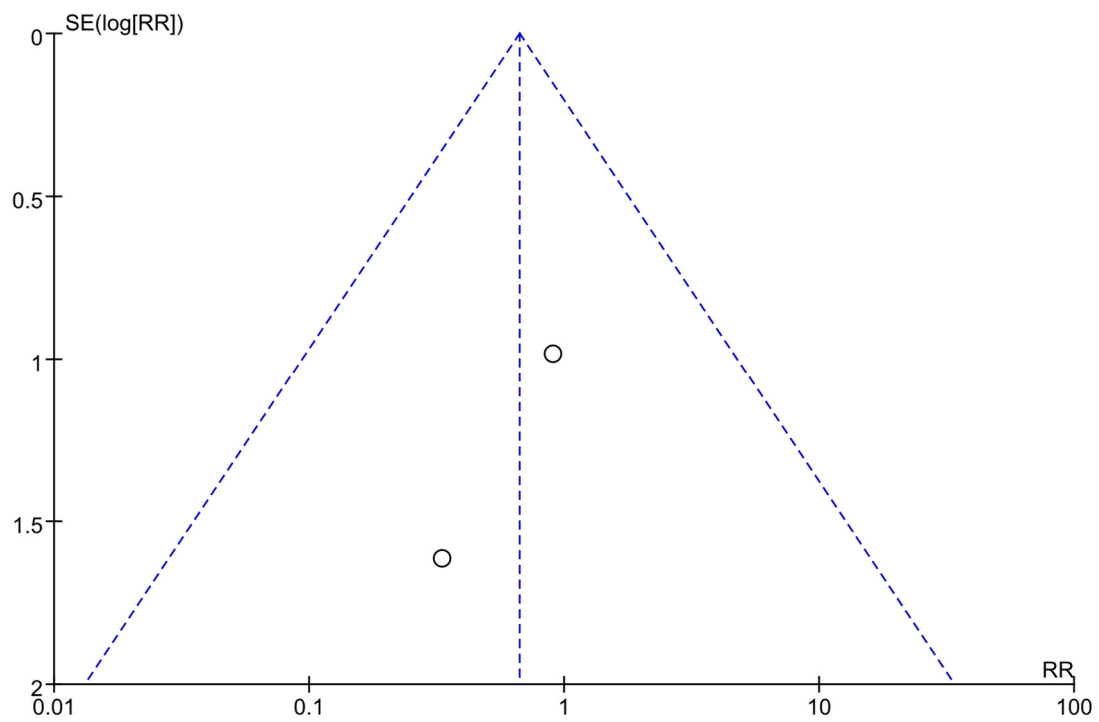

**Figure S9.** Funnel plot of thrombosis.

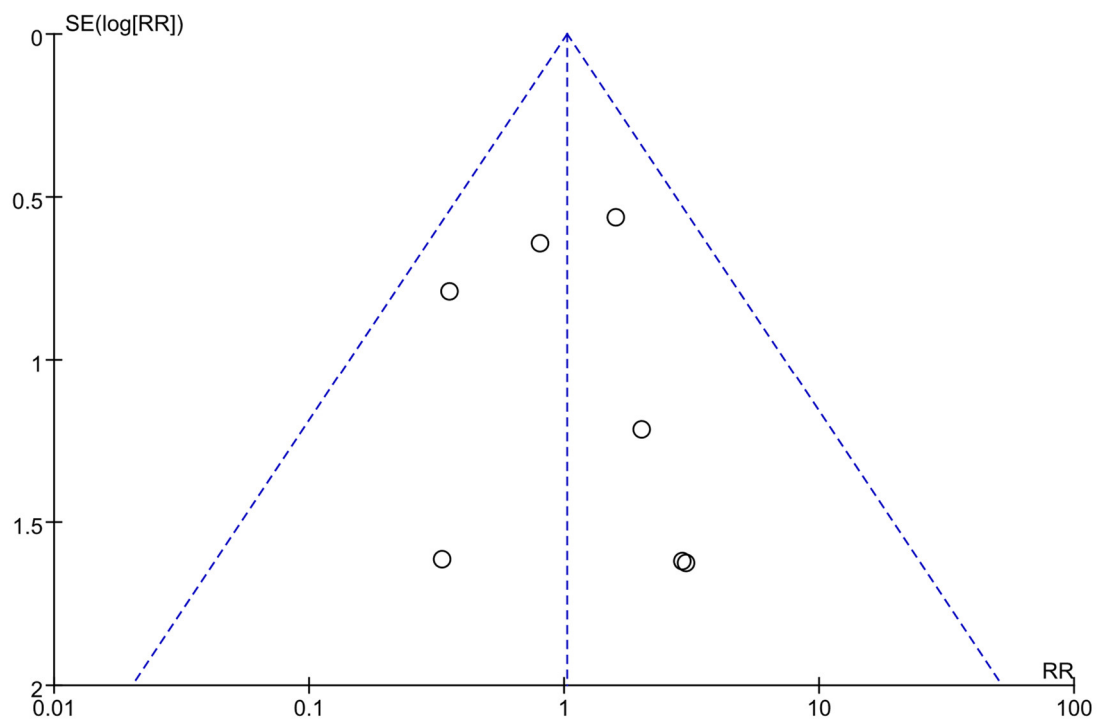

**Figure S10.** Funnel plot of revisions (without age limit).

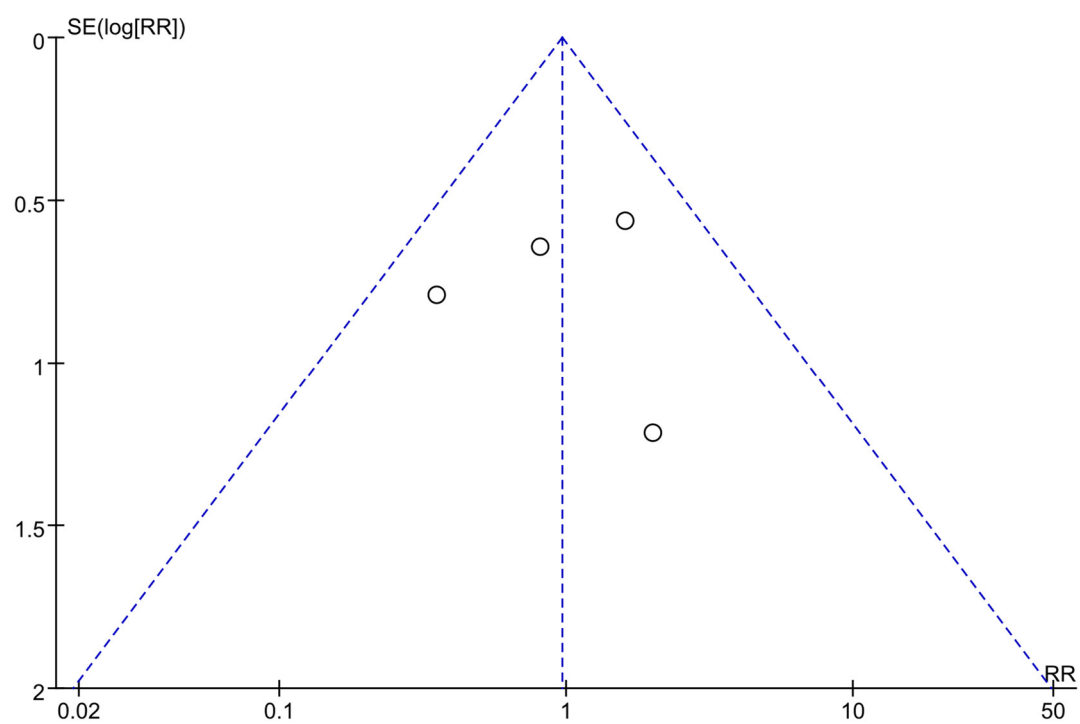

**Figure S11.** Funnel plot of revisions in young patients.

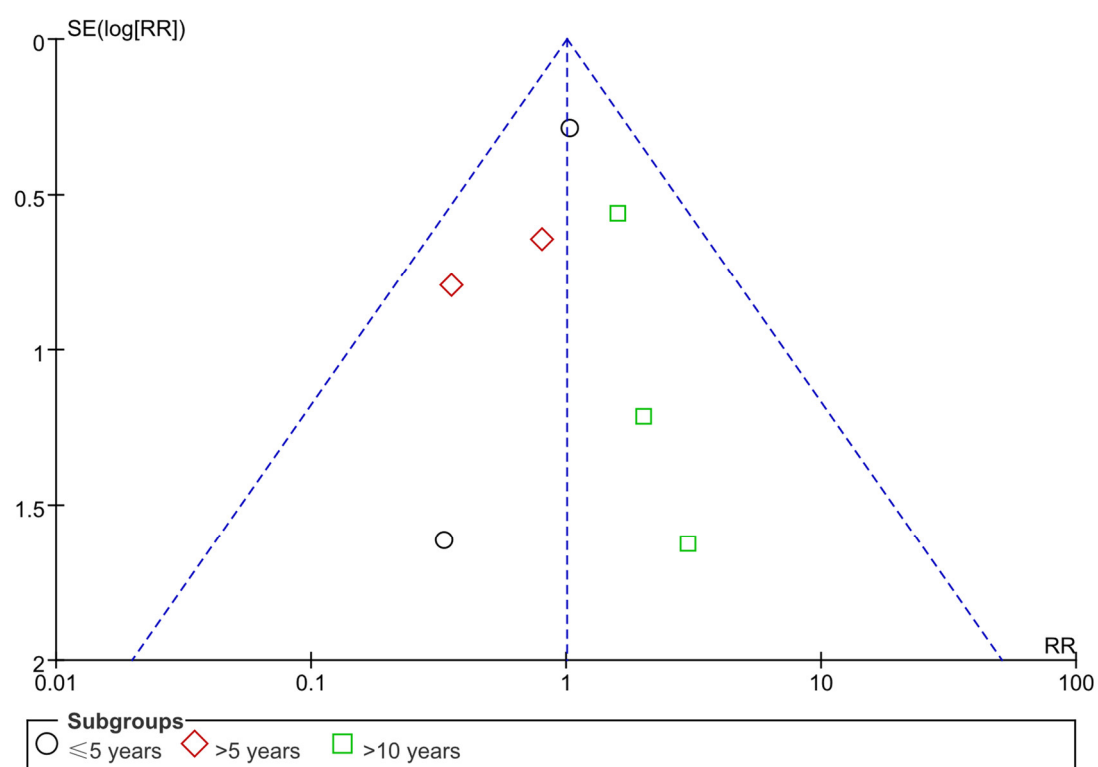

**Figure S12.** Funnel plot of revisions by time.
